# Supplementary material
Source: Elsevier journal article supplement (https://www.sciencedirect.com/science/article/pii/S2603647922000082)
Supplement: mmc1 [file S2603647922000082:mmc1.doc]

***Supplementary material***

**Table 1. Escalation and de-escalation of available and occupied beds by all pathologies (Covid-19 and non-Covid-19)**

|  | **All pathologies beds** | | | | | | **Covid-19 beds** | | | | | |
| --- | --- | --- | --- | --- | --- | --- | --- | --- | --- | --- | --- | --- |
| **AHB** | | **NICUB** | | **ICUB** | | **AHB-Covid** | | **NICUB-Covid** | | **ICUB-Covid** | |
| Date | N | % Occ | N | % Occ | N | % Occ | N | % Occ* | N | % Occ* | N | % Occ* |
| 3/18/2020 | 19844 | 77 | 18408 | 78 | 1436 | 66 | 5168 | 34 | 4578 | 32 | 590 | 62 |
| 3/19/2020 | 20133 | 80 | 18659 | 81 | 1474 | 71 | 6338 | 39 | 5660 | 38 | 678 | 65 |
| 3/20/2020 | 20483 | 82 | 18950 | 83 | 1533 | 71 | 7398 | 44 | 6631 | 42 | 767 | 70 |
| 3/21/2020 | 20714 | 84 | 19158 | 85 | 1556 | 75 | 8441 | 48 | 7607 | 47 | 834 | 71 |
| 3/22/2020 | 21456 | 86 | 19820 | 87 | 1636 | 77 | 9669 | 52 | 8722 | 51 | 947 | 75 |
| 3/23/2020 | 21708 | 88 | 20008 | 89 | 1700 | 80 | 10437 | 55 | 9387 | 53 | 1050 | 77 |
| 3/24/2020 | 22043 | 90 | 20272 | 90 | 1771 | 82 | 11145 | 56 | 9995 | 55 | 1150 | 79 |
| 3/25/2020 | 22500 | 91 | 20681 | 92 | 1819 | 84 | 12524 | 61 | 11303 | 60 | 1221 | 80 |
| 3/26/2020 | 23289 | 90 | 21414 | 91 | 1875 | 85 | 13580 | 65 | 12268 | 63 | 1312 | 82 |
| 3/27/2020 | 23965 | 90 | 22047 | 90 | 1918 | 87 | 14177 | 66 | 12780 | 64 | 1397 | 84 |
| 3/28/2020 | 24058 | 91 | 22092 | 92 | 1966 | 88 | 14596 | 66 | 13149 | 65 | 1447 | 84 |
| 3/29/2020 | 24315 | 92 | 22337 | 92 | 1978 | 88 | 14917 | 67 | 13457 | 65 | 1460 | 84 |
| 3/30/2020 | 24501 | 92 | 22508 | 92 | 1993 | 89 | 15140 | 67 | 13626 | 66 | 1514 | 85 |
| 3/31/2020 | 24667 | 91 | 22642 | 92 | 2025 | 88 | 15227 | 68 | 13725 | 66 | 1502 | 84 |
| 4/1/2020 | 24792 | 91 | 22740 | 91 | 2052 | 87 | 15225 | 68 | 13697 | 66 | 1528 | 85 |
| 4/2/2020 | 24823 | 90 | 22766 | 90 | 2057 | 86 | 15050 | 67 | 13544 | 66 | 1506 | 85 |
| 4/3/2020 | 24767 | 88 | 22703 | 89 | 2064 | 86 | 14741 | 67 | 13243 | 66 | 1498 | 85 |
| 4/4/2020 | 24694 | 88 | 22632 | 89 | 2062 | 85 | 14604 | 67 | 13096 | 65 | 1508 | 86 |
| 4/5/2020 | 24624 | 88 | 22550 | 88 | 2074 | 85 | 14501 | 67 | 12991 | 65 | 1510 | 86 |
| 4/6/2020 | 24512 | 86 | 22416 | 86 | 2096 | 84 | 13950 | 66 | 12456 | 64 | 1494 | 85 |
| 4/7/2020 | 24032 | 86 | 21939 | 86 | 2093 | 82 | 13289 | 64 | 11839 | 63 | 1450 | 84 |
| 4/8/2020 | 23763 | 85 | 21676 | 85 | 2087 | 81 | 12853 | 64 | 11420 | 62 | 1433 | 85 |
| 4/9/2020 | 23235 | 84 | 21161 | 85 | 2074 | 80 | 12432 | 64 | 11033 | 62 | 1399 | 85 |
| 4/10/2020 | 23029 | 83 | 20963 | 83 | 2066 | 79 | 11894 | 62 | 10518 | 60 | 1376 | 84 |
| 4/11/2020 | 22750 | 82 | 20696 | 82 | 2054 | 78 | 11442 | 61 | 10092 | 59 | 1350 | 85 |
| 4/12/2020 | 22634 | 82 | 20583 | 82 | 2051 | 77 | 11233 | 61 | 9906 | 59 | 1327 | 84 |
| 4/13/2020 | 22354 | 81 | 20318 | 81 | 2036 | 77 | 10753 | 59 | 9454 | 57 | 1299 | 83 |
| 4/14/2020 | 22000 | 80 | 19972 | 81 | 2028 | 74 | 10116 | 57 | 8872 | 55 | 1244 | 83 |
| 4/15/2020 | 21854 | 79 | 19834 | 79 | 2020 | 72 | 9653 | 56 | 8447 | 54 | 1206 | 83 |
| 4/16/2020 | 21534 | 78 | 19548 | 78 | 1986 | 72 | 9141 | 55 | 7987 | 52 | 1154 | 80 |
| 4/17/2020 | 21163 | 76 | 19200 | 76 | 1963 | 71 | 8597 | 54 | 7503 | 51 | 1094 | 78 |
| 4/18/2020 | 20989 | 75 | 19041 | 75 | 1948 | 71 | 8291 | 53 | 7168 | 50 | 1123 | 81 |
| 4/19/2020 | 20906 | 75 | 18959 | 76 | 1947 | 70 | 8191 | 52 | 7080 | 49 | 1111 | 82 |
| 4/20/2020 | 20634 | 75 | 18708 | 76 | 1926 | 69 | 7930 | 51 | 6854 | 48 | 1076 | 80 |
| 4/21/2020 | 20394 | 74 | 18509 | 75 | 1885 | 68 | 7464 | 49 | 6440 | 46 | 1024 | 80 |
| 4/22/2020 | 20183 | 74 | 18313 | 74 | 1870 | 67 | 7077 | 47 | 6096 | 45 | 981 | 78 |
| 4/23/2020 | 19774 | 73 | 17956 | 74 | 1818 | 66 | 6601 | 45 | 5652 | 42 | 949 | 79 |
| 4/24/2020 | 19435 | 72 | 17611 | 73 | 1824 | 64 | 6183 | 44 | 5291 | 41 | 892 | 76 |
| 4/25/2020 | 19236 | 72 | 17441 | 73 | 1795 | 64 | 5892 | 43 | 5019 | 40 | 873 | 77 |
| 4/26/2020 | 19179 | 73 | 17376 | 74 | 1803 | 62 | 5820 | 42 | 4965 | 39 | 855 | 77 |
| 4/27/2020 | 19203 | 73 | 17421 | 74 | 1782 | 61 | 5484 | 39 | 4669 | 36 | 815 | 75 |
| 4/28/2020 | 19109 | 72 | 17360 | 73 | 1749 | 61 | 5171 | 37 | 4398 | 35 | 773 | 73 |
| 4/29/2020 | 18952 | 73 | 17260 | 74 | 1692 | 61 | 4945 | 36 | 4218 | 33 | 727 | 70 |
| 4/30/2020 | 18733 | 71 | 17060 | 72 | 1673 | 62 | 4546 | 34 | 3840 | 31 | 706 | 68 |
| 5/1/2020 | 18696 | 70 | 17044 | 71 | 1652 | 60 | 4270 | 33 | 3589 | 30 | 681 | 68 |
| 5/2/2020 | 18639 | 70 | 16989 | 71 | 1650 | 57 | 4221 | 32 | 3547 | 29 | 674 | 71 |
| 5/3/2020 | 18639 | 70 | 16993 | 72 | 1646 | 57 | 4228 | 32 | 3568 | 29 | 660 | 70 |
| 5/4/2020 | 18586 | 71 | 16954 | 73 | 1632 | 57 | 4103 | 31 | 3463 | 28 | 640 | 68 |
| 5/5/2020 | 18549 | 71 | 16946 | 73 | 1603 | 58 | 3902 | 29 | 3292 | 27 | 610 | 65 |
| 5/6/2020 | 18478 | 72 | 16899 | 73 | 1579 | 59 | 3560 | 27 | 2978 | 24 | 582 | 63 |
| 5/7/2020 | 18471 | 72 | 16916 | 73 | 1555 | 58 | 3343 | 25 | 2806 | 23 | 537 | 60 |
| 5/8/2020 | 18282 | 71 | 16767 | 72 | 1515 | 57 | 3131 | 24 | 2629 | 22 | 502 | 58 |
| 5/9/2020 | 18263 | 69 | 16751 | 70 | 1512 | 53 | 2915 | 23 | 2450 | 21 | 465 | 58 |
| 5/10/2020 | 18262 | 70 | 16769 | 71 | 1493 | 53 | 2889 | 23 | 2437 | 20 | 452 | 57 |
| 5/11/2020 | 18271 | 72 | 16758 | 73 | 1513 | 53 | 2788 | 21 | 2357 | 19 | 431 | 54 |
| 5/12/2020 | 18243 | 71 | 16734 | 73 | 1509 | 52 | 2649 | 20 | 2244 | 18 | 405 | 51 |
| 5/13/2020 | 18126 | 72 | 16652 | 73 | 1474 | 52 | 2472 | 19 | 2076 | 17 | 396 | 52 |
| 5/14/2020 | 18093 | 71 | 16660 | 72 | 1433 | 53 | 2285 | 18 | 1927 | 16 | 358 | 47 |
| 5/15/2020 | 18009 | 68 | 16577 | 70 | 1432 | 52 | 2172 | 18 | 1824 | 16 | 348 | 47 |
| 5/16/2020 | 17974 | 68 | 16542 | 69 | 1432 | 49 | 2102 | 17 | 1767 | 15 | 335 | 47 |
| 5/17/2020 | 18048 | 68 | 16615 | 70 | 1433 | 48 | 2101 | 17 | 1760 | 15 | 341 | 49 |
| 5/18/2020 | 18094 | 70 | 16715 | 72 | 1379 | 52 | 2018 | 16 | 1700 | 14 | 318 | 44 |
| 5/19/2020 | 18054 | 71 | 16670 | 73 | 1384 | 54 | 1879 | 15 | 1579 | 13 | 300 | 40 |
| 5/20/2020 | 18028 | 71 | 16654 | 73 | 1374 | 55 | 1741 | 14 | 1464 | 12 | 277 | 37 |
| 5/21/2020 | 17942 | 72 | 16578 | 73 | 1364 | 54 | 1622 | 13 | 1355 | 11 | 267 | 36 |
| 5/22/2020 | 17835 | 70 | 16481 | 72 | 1354 | 54 | 1504 | 12 | 1247 | 11 | 257 | 35 |
| 5/23/2020 | 17811 | 69 | 16463 | 70 | 1348 | 52 | 1423 | 12 | 1180 | 10 | 243 | 35 |
| 5/24/2020 | 17882 | 68 | 16536 | 70 | 1346 | 46 | 1394 | 11 | 1158 | 10 | 236 | 38 |
| 5/25/2020 | 18003 | 71 | 16685 | 72 | 1318 | 51 | 1349 | 11 | 1117 | 9 | 232 | 34 |
| 5/26/2020 | 17997 | 73 | 16687 | 75 | 1310 | 53 | 1264 | 10 | 1052 | 8 | 212 | 31 |
| 5/27/2020 | 17956 | 74 | 16680 | 75 | 1276 | 53 | 1204 | 9 | 1004 | 8 | 200 | 29 |
| 5/28/2020 | 17954 | 74 | 16676 | 76 | 1278 | 52 | 1124 | 8 | 937 | 7 | 187 | 28 |
| 5/29/2020 | 17978 | 71 | 16703 | 73 | 1275 | 52 | 1033 | 8 | 857 | 7 | 176 | 26 |
| 5/30/2020 | 17953 | 69 | 16679 | 71 | 1274 | 49 | 1015 | 8 | 841 | 7 | 174 | 28 |
| 5/31/2020 | 17961 | 70 | 16684 | 71 | 1277 | 48 | 1027 | 8 | 854 | 7 | 173 | 28 |
| 6/1/2020 | 18190 | 72 | 16875 | 74 | 1315 | 51 | 855 | 7 | 685 | 6 | 170 | 25 |
| 6/2/2020 | 18178 | 73 | 16863 | 74 | 1315 | 53 | 825 | 6 | 666 | 5 | 159 | 23 |
| 6/3/2020 | 18189 | 74 | 16894 | 75 | 1295 | 56 | 677 | 5 | 527 | 4 | 150 | 21 |
| 6/4/2020 | 18215 | 74 | 16910 | 75 | 1305 | 55 | 630 | 5 | 490 | 4 | 140 | 19 |
| 6/5/2020 | 18168 | 72 | 16854 | 73 | 1314 | 55 | 579 | 4 | 438 | 4 | 141 | 19 |
| 6/6/2020 | 18141 | 69 | 16833 | 70 | 1308 | 48 | 564 | 5 | 426 | 4 | 138 | 22 |
| 6/7/2020 | 18177 | 68 | 16869 | 70 | 1308 | 47 | 570 | 5 | 426 | 4 | 144 | 23 |
| 6/8/2020 | 18198 | 72 | 16890 | 74 | 1308 | 53 | 560 | 4 | 421 | 3 | 139 | 20 |
| 6/9/2020 | 18193 | 74 | 16888 | 76 | 1305 | 55 | 534 | 4 | 403 | 3 | 131 | 18 |
| 6/10/2020 | 18139 | 75 | 16848 | 77 | 1291 | 56 | 491 | 4 | 369 | 3 | 122 | 17 |
| 6/11/2020 | 18188 | 76 | 16903 | 77 | 1285 | 58 | 468 | 3 | 350 | 3 | 118 | 16 |
| 6/12/2020 | 18146 | 72 | 16874 | 74 | 1272 | 56 | 434 | 3 | 316 | 3 | 118 | 17 |
| 6/13/2020 | 18120 | 70 | 16853 | 71 | 1267 | 51 | 435 | 3 | 321 | 3 | 114 | 18 |
| 6/14/2020 | 18114 | 70 | 16848 | 71 | 1266 | 48 | 436 | 3 | 325 | 3 | 111 | 18 |
| 6/15/2020 | 18154 | 72 | 16882 | 74 | 1272 | 54 | 431 | 3 | 321 | 3 | 110 | 16 |
| 6/16/2020 | 18158 | 74 | 16888 | 76 | 1270 | 57 | 403 | 3 | 298 | 2 | 105 | 15 |
| 6/17/2020 | 18177 | 76 | 16905 | 77 | 1272 | 58 | 381 | 3 | 278 | 2 | 103 | 14 |
| 6/18/2020 | 18163 | 76 | 16908 | 77 | 1255 | 56 | 369 | 3 | 268 | 2 | 101 | 14 |
| 6/19/2020 | 18144 | 74 | 16889 | 75 | 1255 | 57 | 355 | 3 | 261 | 2 | 94 | 13 |
| 6/20/2020 | 18094 | 70 | 16839 | 72 | 1255 | 52 | 342 | 3 | 249 | 2 | 93 | 14 |
| 6/21/2020 | 18096 | 70 | 16840 | 72 | 1256 | 52 | 352 | 3 | 259 | 2 | 93 | 14 |

***Data from 18 March to 21 June 2020****. AHB= total available hospital beds; NICUB= non-ICU available beds; ICUB= ICU available beds; AHB-Covid= total beds occupied by Covid-19 patients; NICUB-Covid= NICUB occupied by Covid-19 patients; ICUB-Covid= ICUB occupied by Covid-19 patients; N= number of beds; %Occ.= percentage of occupied beds; %Occ.*= percentage of occupied beds by Covid-19 with respect to occupancy in each category.*

**Table 2. Planned and urgent daily NA and daily NA for Covid-19 to NICUB and ICUB in CoM**

|  | **Planned vs Urgent Daily NA*** | | | | **Daily NA for Covid-19 to NICUB and ICUB** | | | | | | | | |
| --- | --- | --- | --- | --- | --- | --- | --- | --- | --- | --- | --- | --- | --- |
| **Public Hospitals** | | | | **Public Hospitals** | | | **Private Hospitals** | | | **Public & Private H.** | | |
| **Planned NA** | **Urgent NA** | **Total**  **NA** | **Urgent/ total NA** | **NICUB-Covid** | **ICUB-Covid** | **Total-Covid** | **NICUB-Covid** | **ICUB-Covid** | **Total-Covid** | **NICUB-Covid** | **ICUB-Covid** | **Total-Covid** |
| 3/18/2020 | 219 | 1588 | 1807 | 88% | 747 | 65 | 812 | 169 | 24 | 193 | 916 | 89 | 1005 |
| 3/19/2020 | 219 | 1682 | 1901 | 88% | 706 | 79 | 785 | 270 | 26 | 296 | 976 | 105 | 1081 |
| 3/20/2020 | 229 | 1716 | 1945 | 88% | 902 | 64 | 966 | 293 | 28 | 321 | 1195 | 92 | 1287 |
| 3/21/2020 | 88 | 1670 | 1758 | 95% | 974 | 66 | 1040 | 340 | 29 | 369 | 1314 | 95 | 1409 |
| 3/22/2020 | 68 | 1348 | 1416 | 95% | 1020 | 74 | 1094 | 244 | 35 | 279 | 1264 | 109 | 1373 |
| 3/23/2020 | 191 | 1575 | 1766 | 89% | 890 | 80 | 970 | 248 | 25 | 273 | 1138 | 105 | 1243 |
| 3/24/2020 | 223 | 1962 | 2185 | 90% | 1256 | 81 | 1337 | 317 | 22 | 339 | 1573 | 103 | 1676 |
| 3/25/2020 | 220 | 1928 | 2148 | 90% | 1705 | 83 | 1788 | 314 | 26 | 340 | 2019 | 109 | 2128 |
| 3/26/2020 | 183 | 2028 | 2211 | 92% | 1702 | 97 | 1799 | 345 | 27 | 372 | 2047 | 124 | 2171 |
| 3/27/2020 | 174 | 1879 | 2053 | 92% | 1394 | 90 | 1484 | 377 | 23 | 400 | 1771 | 113 | 1884 |
| 3/28/2020 | 61 | 1332 | 1393 | 96% | 1301 | 61 | 1362 | 283 | 19 | 302 | 1584 | 80 | 1664 |
| 3/29/2020 | 80 | 1104 | 1184 | 93% | 965 | 60 | 1025 | 245 | 21 | 266 | 1210 | 81 | 1291 |
| 3/30/2020 | 123 | 1669 | 1792 | 93% | 1002 | 77 | 1079 | 245 | 27 | 272 | 1247 | 104 | 1351 |
| 3/31/2020 | 135 | 1785 | 1920 | 93% | 1333 | 96 | 1429 | 279 | 15 | 294 | 1612 | 111 | 1723 |
| 4/1/2020 | 158 | 1637 | 1795 | 91% | 1340 | 77 | 1417 | 273 | 13 | 286 | 1613 | 90 | 1703 |
| 4/2/2020 | 151 | 1572 | 1723 | 91% | 1222 | 69 | 1291 | 231 | 10 | 241 | 1453 | 79 | 1532 |
| 4/3/2020 | 140 | 1418 | 1558 | 91% | 1064 | 72 | 1136 | 181 | 13 | 194 | 1245 | 85 | 1330 |
| 4/4/2020 | 58 | 1129 | 1187 | 95% | 908 | 73 | 981 | 236 | 17 | 253 | 1144 | 90 | 1234 |
| 4/5/2020 | 62 | 848 | 910 | 93% | 578 | 54 | 632 | 157 | 16 | 173 | 735 | 70 | 805 |
| 4/6/2020 | 169 | 1454 | 1623 | 90% | 551 | 45 | 596 | 164 | 27 | 191 | 715 | 72 | 787 |
| 4/7/2020 | 131 | 899 | 1030 | 87% | 812 | 53 | 865 | 172 | 5 | 177 | 984 | 58 | 1042 |
| 4/8/2020 | 267 | 1138 | 1405 | 81% | 759 | 50 | 809 | 193 | 9 | 202 | 952 | 59 | 1011 |
| 4/9/2020 | 224 | 1130 | 1354 | 83% | 697 | 36 | 733 | 180 | 5 | 185 | 877 | 41 | 918 |
| 4/10/2020 | 218 | 998 | 1216 | 82% | 627 | 37 | 664 | 132 | 8 | 140 | 759 | 45 | 804 |
| 4/11/2020 | 169 | 974 | 1143 | 85% | 553 | 40 | 593 | 114 | 7 | 121 | 667 | 47 | 714 |
| 4/12/2020 | 109 | 801 | 910 | 88% | 408 | 31 | 439 | 117 | 6 | 123 | 525 | 37 | 562 |
| 4/13/2020 | 70 | 706 | 776 | 91% | 360 | 30 | 390 | 106 | 7 | 113 | 466 | 37 | 503 |
| 4/14/2020 | 192 | 1060 | 1252 | 85% | 496 | 40 | 536 | 118 | 5 | 123 | 614 | 45 | 659 |
| 4/15/2020 | 170 | 995 | 1165 | 85% | 489 | 37 | 526 | 123 | 2 | 125 | 612 | 39 | 651 |
| 4/16/2020 | 162 | 956 | 1118 | 86% | 409 | 42 | 451 | 107 | 5 | 112 | 516 | 47 | 563 |
| 4/17/2020 | 79 | 859 | 938 | 92% | 364 | 33 | 397 | 90 | 0 | 90 | 454 | 33 | 487 |
| 4/18/2020 | 83 | 904 | 987 | 92% | 347 | 23 | 370 | 101 | 4 | 105 | 448 | 27 | 475 |
| 4/19/2020 | 68 | 657 | 725 | 91% | 269 | 22 | 291 | 77 | 4 | 81 | 346 | 26 | 372 |
| 4/20/2020 | 109 | 654 | 763 | 86% | 261 | 28 | 289 | 78 | 2 | 80 | 339 | 30 | 369 |
| 4/21/2020 | 150 | 918 | 1068 | 86% | 324 | 29 | 353 | 86 | 2 | 88 | 410 | 31 | 441 |
| 4/22/2020 | 128 | 862 | 990 | 87% | 268 | 21 | 289 | 86 | 2 | 88 | 354 | 23 | 377 |
| 4/23/2020 | 116 | 820 | 936 | 88% | 265 | 33 | 298 | 83 | 0 | 83 | 348 | 33 | 381 |
| 4/24/2020 | 111 | 786 | 897 | 88% | 204 | 24 | 228 | 99 | 11 | 110 | 303 | 35 | 338 |
| 4/25/2020 | 43 | 803 | 846 | 95% | 208 | 19 | 227 | 87 | 1 | 88 | 295 | 20 | 315 |
| 4/26/2020 | 31 | 639 | 670 | 95% | 129 | 19 | 148 | 55 | 3 | 58 | 184 | 22 | 206 |
| 4/27/2020 | 102 | 630 | 732 | 86% | 107 | 27 | 134 | 55 | 1 | 56 | 162 | 28 | 190 |
| 4/28/2020 | 141 | 821 | 962 | 85% | 154 | 17 | 171 | 62 | 0 | 62 | 216 | 17 | 233 |
| 4/29/2020 | 168 | 915 | 1083 | 84% | 157 | 19 | 176 | 60 | 1 | 61 | 217 | 20 | 237 |
| 4/30/2020 | 133 | 850 | 983 | 86% | 141 | 13 | 154 | 76 | 2 | 78 | 217 | 15 | 232 |
| 5/1/2020 | 36 | 800 | 836 | 96% | 112 | 10 | 122 | 52 | 1 | 53 | 164 | 11 | 175 |
| 5/2/2020 | 21 | 619 | 640 | 97% | 91 | 15 | 106 | 49 | 2 | 51 | 140 | 17 | 157 |
| 5/3/2020 | 24 | 560 | 584 | 96% | 91 | 7 | 98 | 53 | 3 | 56 | 144 | 10 | 154 |
| 5/4/2020 | 139 | 661 | 800 | 83% | 80 | 9 | 89 | 30 | 2 | 32 | 110 | 11 | 121 |
| 5/5/2020 | 196 | 907 | 1103 | 82% | 132 | 23 | 155 | 48 | 0 | 48 | 180 | 23 | 203 |
| 5/6/2020 | 168 | 922 | 1090 | 85% | 94 | 18 | 112 | 34 | 2 | 36 | 128 | 20 | 148 |
| 5/7/2020 | 190 | 863 | 1053 | 82% | 97 | 5 | 102 | 48 | 3 | 51 | 145 | 8 | 153 |
| 5/8/2020 | 152 | 785 | 937 | 84% | 96 | 13 | 109 | 36 | 2 | 38 | 132 | 15 | 147 |
| 5/9/2020 | 24 | 831 | 855 | 97% | 99 | 12 | 111 | 24 | 0 | 24 | 123 | 12 | 135 |
| 5/10/2020 | 41 | 672 | 713 | 94% | 58 | 7 | 65 | 33 | 2 | 35 | 91 | 9 | 100 |
| 5/11/2020 | 215 | 620 | 835 | 74% | 52 | 13 | 65 | 33 | 1 | 34 | 85 | 14 | 99 |
| 5/12/2020 | 269 | 864 | 1133 | 76% | 81 | 10 | 91 | 40 | 2 | 42 | 121 | 12 | 133 |
| 5/13/2020 | 235 | 803 | 1038 | 77% | 80 | 7 | 87 | 26 | 2 | 28 | 106 | 9 | 115 |
| 5/14/2020 | 212 | 799 | 1011 | 79% | 55 | 9 | 64 | 40 | 1 | 41 | 95 | 10 | 105 |
| 5/15/2020 | 53 | 777 | 830 | 94% | 69 | 2 | 71 | 31 | 1 | 32 | 100 | 3 | 103 |
| 5/16/2020 | 18 | 623 | 641 | 97% | 43 | 5 | 48 | 27 | 2 | 29 | 70 | 7 | 77 |
| 5/17/2020 | 41 | 566 | 607 | 93% | 34 | 10 | 44 | 22 | 0 | 22 | 56 | 10 | 66 |
| 5/18/2020 | 264 | 627 | 891 | 70% | 43 | 6 | 49 | 24 | 0 | 24 | 67 | 6 | 73 |
| 5/19/2020 | 354 | 887 | 1241 | 71% | 44 | 10 | 54 | 28 | 0 | 28 | 72 | 10 | 82 |
| 5/20/2020 | 304 | 848 | 1152 | 74% | 45 | 7 | 52 | 30 | 0 | 30 | 75 | 7 | 82 |
| 5/21/2020 | 321 | 852 | 1173 | 73% | 48 | 10 | 58 | 28 | 0 | 28 | 76 | 10 | 86 |
| 5/22/2020 | 230 | 847 | 1077 | 79% | 42 | 7 | 49 | 17 | 0 | 17 | 59 | 7 | 66 |
| 5/23/2020 | 31 | 858 | 889 | 97% | 45 | 1 | 46 | 15 | 0 | 15 | 60 | 1 | 61 |
| 5/24/2020 | 43 | 654 | 697 | 94% | 32 | 3 | 35 | 24 | 0 | 24 | 56 | 3 | 59 |
| 5/25/2020 | 306 | 719 | 1025 | 70% | 39 | 3 | 42 | 20 | 0 | 20 | 59 | 3 | 62 |
| 5/26/2020 | 381 | 975 | 1356 | 72% | 41 | 5 | 46 | 18 | 0 | 18 | 59 | 5 | 64 |
| 5/27/2020 | 373 | 905 | 1278 | 71% | 46 | 2 | 48 | 20 | 0 | 20 | 66 | 2 | 68 |
| 5/28/2020 | 359 | 899 | 1258 | 71% | 43 | 4 | 47 | 16 | 0 | 16 | 59 | 4 | 63 |
| 5/29/2020 | 270 | 832 | 1102 | 75% | 26 | 5 | 31 | 17 | 0 | 17 | 43 | 5 | 48 |
| 5/30/2020 | 50 | 831 | 881 | 94% | 34 | 2 | 36 | 12 | 0 | 12 | 46 | 2 | 48 |
| 5/31/2020 | 53 | 678 | 731 | 93% | 18 | 1 | 19 | 9 | 0 | 9 | 27 | 1 | 28 |
| 6/1/2020 | 398 | 695 | 1093 | 64% | 8 | 6 | 14 | 8 | 0 | 8 | 16 | 6 | 22 |
| 6/2/2020 | 441 | 882 | 1323 | 67% | 10 | 3 | 13 | 10 | 0 | 10 | 20 | 3 | 23 |
| 6/3/2020 | 482 | 869 | 1351 | 64% | 18 | 3 | 21 | 18 | 0 | 18 | 36 | 3 | 39 |
| 6/4/2020 | 489 | 875 | 1364 | 64% | 15 | 1 | 16 | 15 | 0 | 15 | 30 | 1 | 31 |
| 6/5/2020 | 334 | 847 | 1181 | 72% | 4 | 2 | 6 | 4 | 0 | 4 | 8 | 2 | 10 |
| 6/6/2020 | 50 | 818 | 868 | 94% | 4 | 2 | 6 | 4 | 0 | 4 | 8 | 2 | 10 |
| 6/7/2020 | 60 | 640 | 700 | 91% | 0 | 4 | 4 | 0 | 0 | 0 | 0 | 4 | 4 |
| 6/8/2020 | 484 | 657 | 1141 | 58% | 8 | 4 | 12 | 8 | 0 | 8 | 16 | 4 | 20 |
| 6/9/2020 | 568 | 937 | 1505 | 62% | 7 | 4 | 11 | 7 | 0 | 7 | 14 | 4 | 18 |
| 6/10/2020 | 532 | 904 | 1436 | 63% | 0 | 4 | 4 | 0 | 0 | 0 | 0 | 4 | 4 |
| 6/11/2020 | 535 | 904 | 1439 | 63% | 4 | 4 | 8 | 4 | 1 | 5 | 8 | 5 | 13 |
| 6/12/2020 | 392 | 872 | 1264 | 69% | 4 | 7 | 11 | 4 | 0 | 4 | 8 | 7 | 15 |
| 6/13/2020 | 33 | 829 | 862 | 96% | 0 | 0 | 0 | 0 | 0 | 0 | 0 | 0 | 0 |
| 6/14/2020 | 38 | 650 | 688 | 94% | 6 | 3 | 9 | 6 | 0 | 6 | 12 | 3 | 15 |
| 6/15/2020 | 547 | 683 | 1230 | 56% | 0 | 2 | 2 | 0 | 0 | 0 | 0 | 2 | 2 |
| 6/16/2020 | 595 | 890 | 1485 | 60% | 3 | 2 | 5 | 3 | 0 | 3 | 6 | 2 | 8 |
| 6/17/2020 | 600 | 915 | 1515 | 60% | 6 | 0 | 6 | 6 | 1 | 7 | 12 | 1 | 13 |
| 6/18/2020 | 565 | 889 | 1454 | 61% | 0 | 3 | 3 | 0 | 0 | 0 | 0 | 3 | 3 |
| 6/19/2020 | 456 | 851 | 1307 | 65% | 1 | 0 | 1 | 1 | 1 | 2 | 2 | 1 | 3 |
| 6/20/2020 | 43 | 918 | 961 | 96% | 3 | 1 | 4 | 3 | 0 | 3 | 6 | 1 | 7 |
| 6/21/2020 | 63 | 642 | 705 | 91% | 0 | 0 | 0 | 0 | 0 | 0 | 0 | 0 | 0 |

***Data from 18 March to 21 June 2020.*** *Planned and urgent daily new admissions (NA) for Covid-19 and non–Covid-19 patients in public hospitals; and daily NA for Covid-19 to NICUB and ICUB in public hospitals, private hospitals and both in CoM. *Our data do not distinguish between patients with or without Covid-19; this classification was done when a bed was assigned. NICUB-Covid=NICUB occupied by Covid-19; ICUB-Covid=ICUB occupied by Covid-19; Total-Covid=total beds occupied by Covid-19.*
